# Supplementary material
Source: PubMed Central journal article supplement (PMC2966531)
Supplement: NIHMS240217-supplement-01.pdf [file NIHMS240217-supplement-01.pdf]

**Fig. S1**

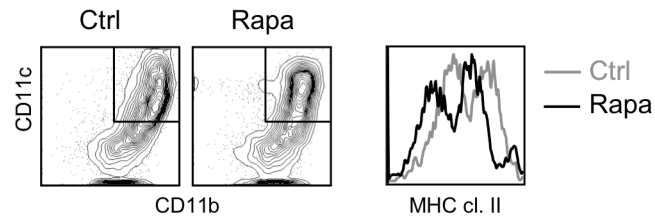

**Figure S1. The effect of rapamycin on GM-CSF-driven DC development.**

Rapamycin (10 ng/ml) was added on day 0 to GM-CSF-supplemented cultures of wild-type BM. Shown are staining profiles on day 8, and the histograms of MHC cl. II expression in the gated CD11c<sup>+</sup> cDC (representative of 3 independent cultures). No reduction in the total cell output of rapamycin-treated cultures was noted (not shown).

**Fig. S2**

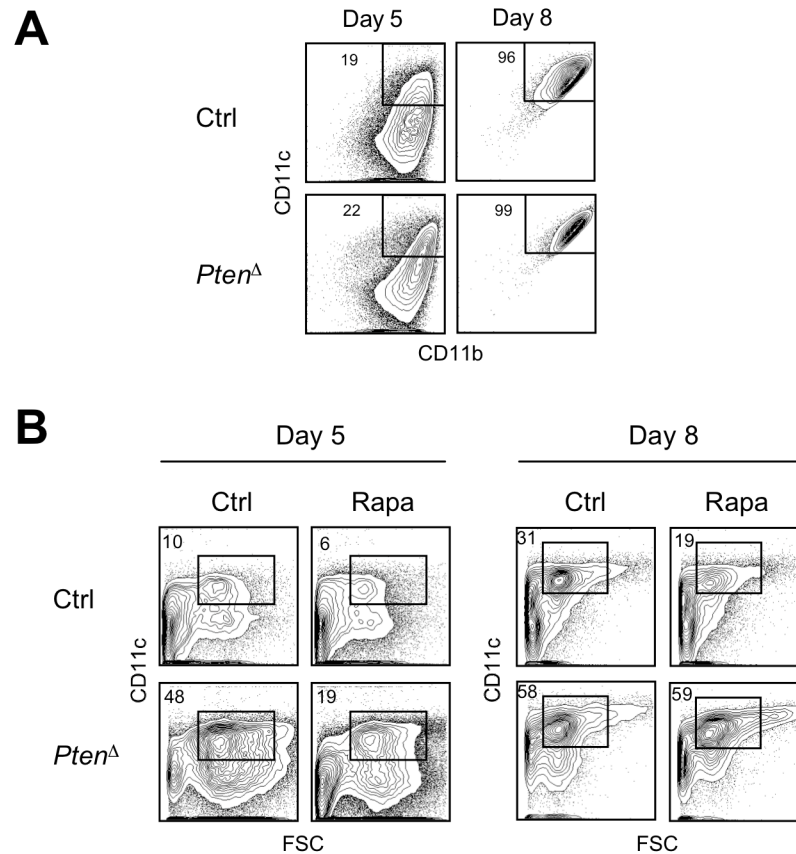

**Figure S2. DC development from *Pten*-deficient bone marrow.**

*Pten* deletion was induced by tamoxifen administration to *Pten*<sup>fl/fl</sup> *Gt(ROSA)26Sor-CreER*<sup>+</sup> animals (*Pten*<sup>Δ</sup>) or littermate controls (Ctrl) as in Fig. 2.

**(A)** GM-CSF-driven DC development. Shown are staining profiles of GM-CSF-supplemented control and *Pten*<sup>Δ</sup> BM cultures on days 5 and 8. No difference in the total cell output of the cultures was noted (not shown).

**(B)** The effect of rapamycin on Flt3L-driven DC development. Control and *Pten*<sup>Δ</sup> BM cells were cultured with Flt3L in the presence or absence of 10 ng/ml rapamycin, and analyzed on days 5 and 8. Shown are staining profiles (representative of two independent experiments) with live CD11c<sup>+</sup> DC highlighted.

**Fig. S3**

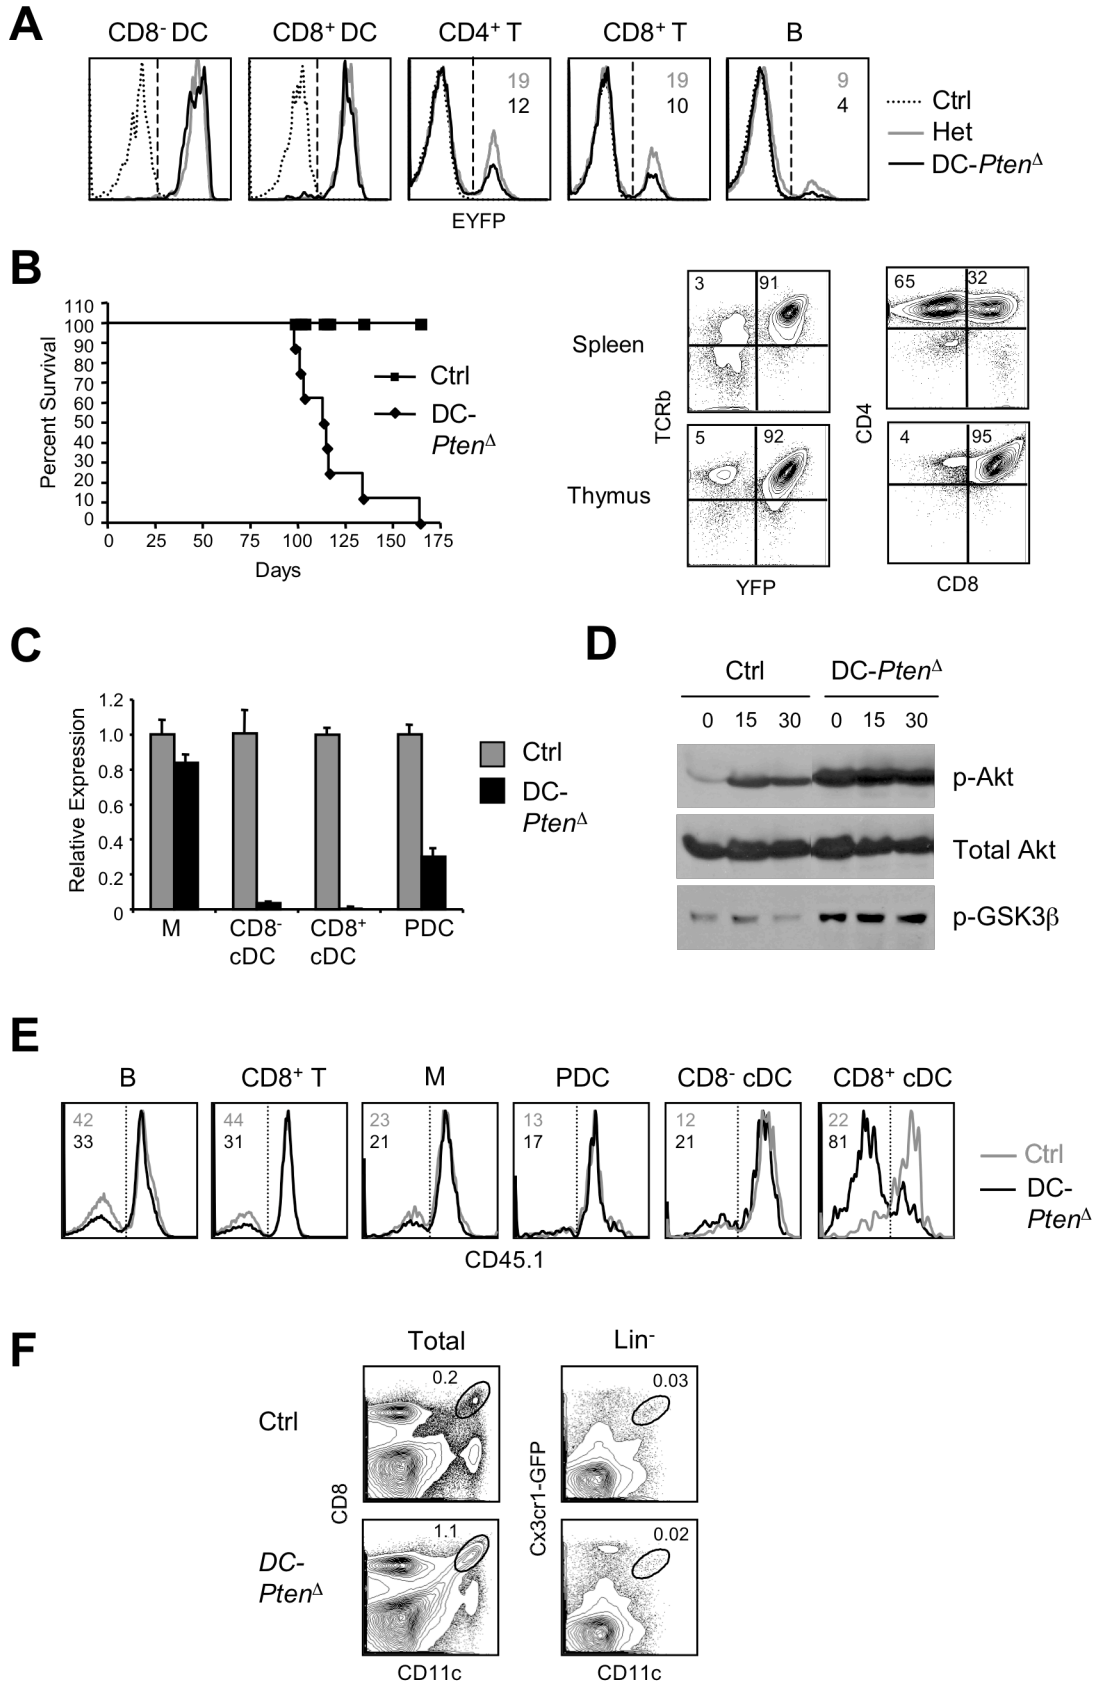

### Figure S3. Characterization of DC-specific *Pten* deletion.

*Pten*<sup>fl/fl</sup> *Itgax*-Cre<sup>+</sup> animals (DC-*Pten*<sup>Δ</sup>) and control *Itgax*-Cre<sup>-</sup> littermates were analyzed.

**(A)** The specificity of Cre recombination in DC-*Pten*<sup>Δ</sup> animals crossed with the Cre-inducible *Gt(ROSA)26Sor*-StopFlox-EYFP allele (Srinivas et al., 2001). Shown are histograms of EYFP fluorescence in the CD11c<sup>hi</sup> MHC cl. II<sup>+</sup> cDC subsets, T or B lymphocytes from *Gt(ROSA)26Sor*-StopFlox-EYFP<sup>+</sup> Cre-negative (Ctrl), *Itgax*-Cre<sup>+</sup> *Pten* heterozygous (*Pten*<sup>fl/wt</sup>, Het) or *Itgax*-Cre<sup>+</sup> *Pten*<sup>fl/fl</sup> (DC-*Pten*<sup>Δ</sup>) animals.

**(B)** Age-dependent development of T cell lymphomas in DC-*Pten*<sup>Δ</sup> mice. Shown is Kaplan-Meier survival plot of the DC-*Pten*<sup>Δ</sup> and littermate control mice. On necropsy all DC-*Pten*<sup>Δ</sup> mice showed a large thymic mass in the mediastinum, splenomegaly and lymphadenopathy. Flow cytometry plots represent the analysis of a moribund *Gt(ROSA)26Sor*-StopFlox-EYFP<sup>+</sup> DC-*Pten*<sup>Δ</sup> mouse, showing a recombined EYFP<sup>+</sup> double-positive T cell lymphoma.

**(C)** The expression of *Pten* mRNA in monocytes or macrophages (M, side scatter<sup>lo</sup> CD11c<sup>-</sup> CD11b<sup>+</sup>), cDC (CD11c<sup>hi</sup> MHC cl. II<sup>+</sup> CD8<sup>+</sup> or CD8<sup>-</sup>) or PDC (CD11c<sup>lo</sup> Bst2<sup>+</sup>) from DC-*Pten*<sup>Δ</sup> or control (Ctrl) mice. Shown are normalized quantitative RT-PCR results relative to the expression value in control monocytes (mean ± S.D. of triplicate reactions). RT-PCR was performed using SYBR Green method with primers specific for *Pten* exon deleted after Cre recombination: 5'-TGGATTCAAAGCATAAAAACCATTTAC-3' and 5'-CAAAGGATACTGTGCAACTCTGC-3'.

**(D)** Western blot analysis of PI3K signaling in BM-derived cDC. GM-CSF-supplemented BM cultures from control and DC-*Pten*<sup>Δ</sup> mice were left untreated (0) or stimulated with 1 μg/ml LPS for 15 or 30 min., and analyzed using antibodies against phosphorylated Akt

Ser473 and GSK3 $\beta$  Ser9 (Cell Signaling Technology). Note the constitutive Akt and GSK3 $\beta$  phosphorylation in untreated DC-*Pten*<sup>Δ</sup> DC.

**(E)** Donor contribution to different cell types of chimeric mice. Irradiated CD45.1<sup>+</sup> recipients were reconstituted with CD45.2<sup>+</sup> DC-*Pten*<sup>Δ</sup> or control donor BM and CD45.1<sup>+</sup> competitor BM. Shown are representative CD45.1 expression profiles in the indicated splenic cell types, with the fraction of CD45.1<sup>-</sup> donor-derived cells indicated. Note the substantial (~30-45%) donor contribution in lymphocytes, poor (15-20% contribution in myeloid cells and an overwhelming (>80%) contribution of DC-*Pten*<sup>Δ</sup> but not control donor cells to CD8<sup>+</sup> cDC.

**(F)** Splenic pre-DC after DC-specific *Pten* deletion. Control or DC-*Pten*<sup>Δ</sup> mice carrying the *Cx3cr1*-EGFP knock-in reporter allele were analyzed. Shown is the CD8<sup>+</sup> cDC population among total splenocytes (left), and the *Cx3cr1*<sup>hi</sup> CD11c<sup>lo</sup> pre-cDC population among the gated lineage-negative (MHC II<sup>-</sup> CD11b<sup>-</sup> Gr-1<sup>-</sup> CD8<sup>-</sup>) cells. Percentages out of total splenocytes are indicated. Additional staining for pre-DC markers Flt3 and CD115 confirmed equal fraction of pre-DC in control and DC-*Pten*<sup>Δ</sup> spleens (not shown).

**Fig. S4**

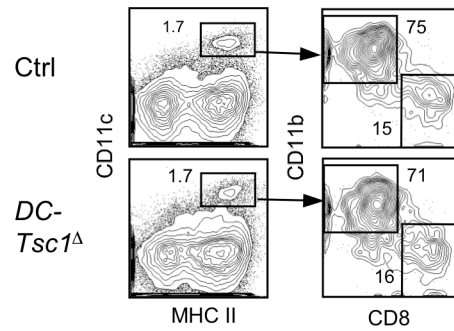

**Figure S4. DC populations in mice with DC-specific deletion of *Tsc1***

*Tsc1* conditional strain (Kwiatkowski et al., 2002) obtained from Jackson Labs was used for DC-specific targeting in *Tsc1*<sup>fl/fl</sup> *Itgax-Cre*<sup>+</sup> (DC-*Tsc1*<sup>Δ</sup>) animals. Shown are staining profiles of splenic DC in the DC-*Tsc1*<sup>Δ</sup> and Cre-negative littermate control mice (representative of three animals per genotype). Note the lack of CD8<sup>+</sup> cDC expansion in DC-*Tsc1*<sup>Δ</sup> mice.

**Fig. S5**

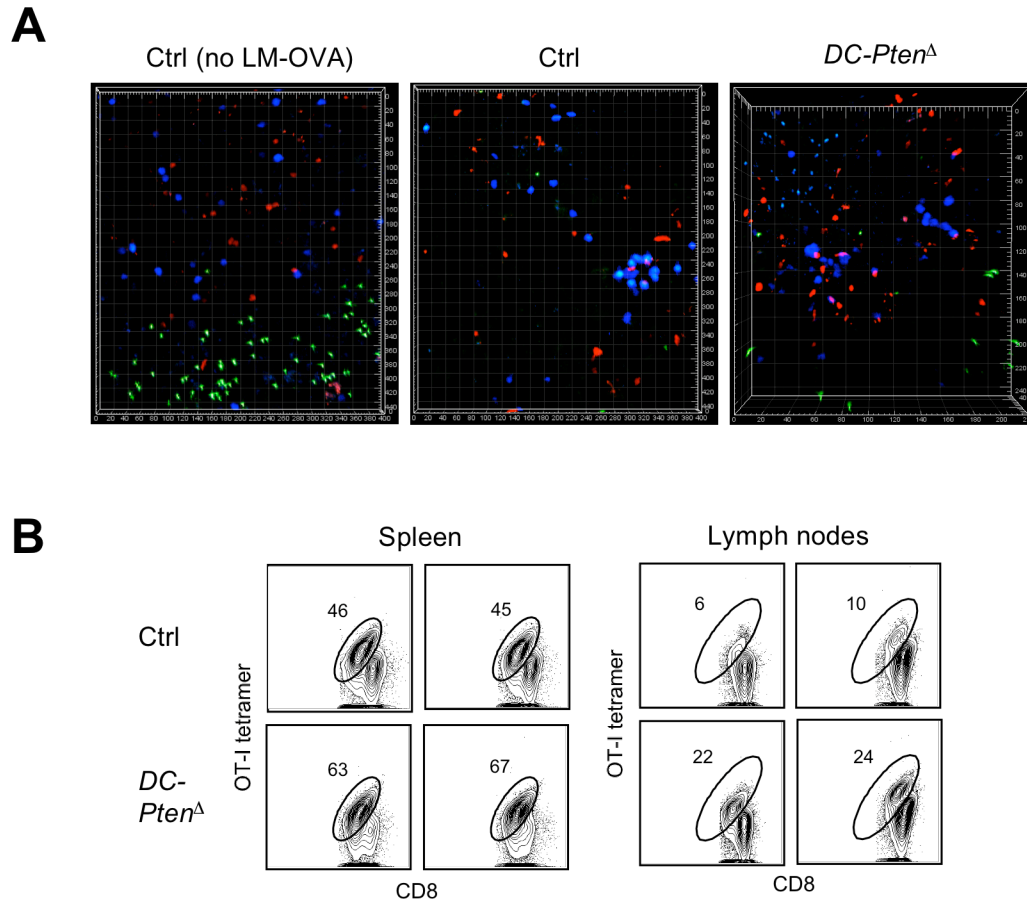

**Figure S5. T cell response to LM-OVA in *DC-Pten<sup>Δ</sup>* mice.**

**(A)** Clustering of OVA-specific T cells in the early phase of LM-OVA infection. Splenic CD8<sup>+</sup> T cells were isolated from OVA-specific OT-I TCR transgenic mice or from wild-type C57BL/6 mice and labeled with Cell Tracker (Invitrogen) Blue and Orange dyes, respectively. Labeled T cells were transferred ( $2 \times 10^6$ /animal i.v.) into *DC-Pten<sup>Δ</sup>* or control animals six hours prior to infection with  $10^5$  LM-OVA. After 24 hr spleens were imaged by multiphoton microscopy as described (Aoshi et al., 2008). Shown are representative still images of OVA-specific (blue) and non-specific polyclonal (red) CD8<sup>+</sup>

T cells from uninfected control, infected control or two infected DC-*Pten*<sup>Δ</sup> animals. Note the prominent clustering of OVA-specific T cells in all infected animals.

**(B)** Expansion of OVA-specific T cells following LM-OVA infection. Splenic CD8<sup>+</sup> T cells from OVA-specific OT-I TCR transgenic mice were transferred to DC-*Pten*<sup>Δ</sup> or control animals (10<sup>6</sup>/animal i.v.) 24 hours prior to infection with 2x10<sup>4</sup> LM-OVA. Six days later, spleen and lymph nodes were analyzed for the presence of OT-I TCR-expressing T cells by flow cytometry. Shown are staining profiles from two control and DC-*Pten*<sup>Δ</sup> animals. Similarly, no difference in the endogenous OVA-specific CD8<sup>+</sup> T cell expansion was observed between control and DC-*Pten*<sup>Δ</sup> animals (not shown).

### Supplemental References

Aoshi, T., Zinselmeyer, B.H., Konjufca, V., Lynch, J.N., Zhang, X., Koide, Y., and Miller, M.J. (2008). Bacterial entry to the splenic white pulp initiates antigen presentation to CD8<sup>+</sup> T cells. *Immunity* 29, 476-486.

Kwiatkowski, D.J., Zhang, H., Bandura, J.L., Heiberger, K.M., Glogauer, M., el-Hashemite, N., and Onda, H. (2002). A mouse model of TSC1 reveals sex-dependent lethality from liver hemangiomas, and up-regulation of p70S6 kinase activity in Tsc1 null cells. *Hum Mol Genet* 11, 525-534.

Srinivas, S., Watanabe, T., Lin, C.S., William, C.M., Tanabe, Y., Jessell, T.M., and Costantini, F. (2001). Cre reporter strains produced by targeted insertion of EYFP and ECFP into the ROSA26 locus. *BMC Dev Biol* 1, 4.
